# Supplementary material
Source: Springer Nature journal article supplement (https://www.springermedizin.de/resource/supplementary/12245_2010_60_MOESM2_ESM.pdf/9672684)

**Presentations**

3500  
3000  
2500  
2000  
1500  
1000  
500  
0

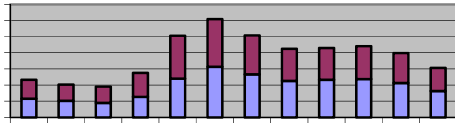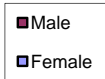

0000-0200

0400-0600

0800-1000

1200-1400

1600-1800

2000-2200

**Time of day**

Supplement: MOESM2 [file 9672684]
